# Supplementary material
Source: PubMed Central journal article supplement (PMC5291035)
Supplement: supp_pp.16.01527_PP2016-01527DR1_Supplemental_Material.pdf [file supp_pp.16.01527_PP2016-01527DR1_Supplemental_Material.pdf]

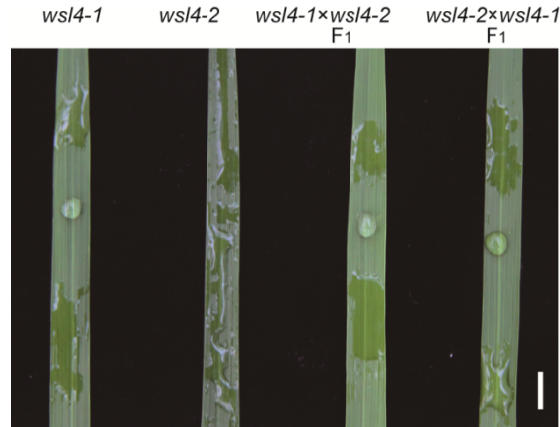

**Supplemental Figure S1.** Water retention of leaf blades in *wsl4-1*, *wsl4-2* and their F<sub>1</sub> generations. After reciprocal crosses, the leaf blades of F<sub>1</sub> generations from *wsl4-1* and *wsl4-2* showed sectorized -wetting trait identical to *wsl4-1*. Scale bars = 1.0 cm.

```

MPGAAGYSGSVKLYVYKLGYYLVNHFLTLVLPVMAATALELARMGPGELLSLWRS LQL 60
DLVHILCSVFLVVFVGT VYFM SRPRPVYLV DYSYKPPPS CRVPFATFMEHTRLITDDEK 120
SVRFQTRILERSGLGEETCLPPANHYIPPNP SMEASRAEAQLVIFSAIDDLVRR TGLKPK 180
DIDILVVNCSLFSPTPSLSAMIINKYKLRSNIRSFNLSGMGCSAGLISLDLARDMLQVHP 240
NSNALVVSTEIITPNFYWGTRRDMLPNCLFRMGAAAILLSNRRREARRAKYRLMHVVRT 300
HKGADDRAYRCVYEEEDEQGHSGISLSKELMAIAGDALKSNITTIGPLVLPMS EQLLFFF 360
RLVGRKLINKKWKPYPDFKLA FEHFCIHAGGRAVIDELQKNLDLSAQHVEASRMTLHRF 420
GNTSSSSLWYELAYIEAKGRMRRGDRVWQIGFGSGFKCNSAVWKCLRTVKTPADGPWDDC 480
IHRYPVDIPEVVKL 494

```

**Supplemental Figure S2.** The amino acid sequence of WSL4. The two predicted transmembrane domains are underlined; the mutations in *wsl4-1* and *wsl4-2* are indicated by black boxes; the predicted positions of active site residues are indicated by black arrows.

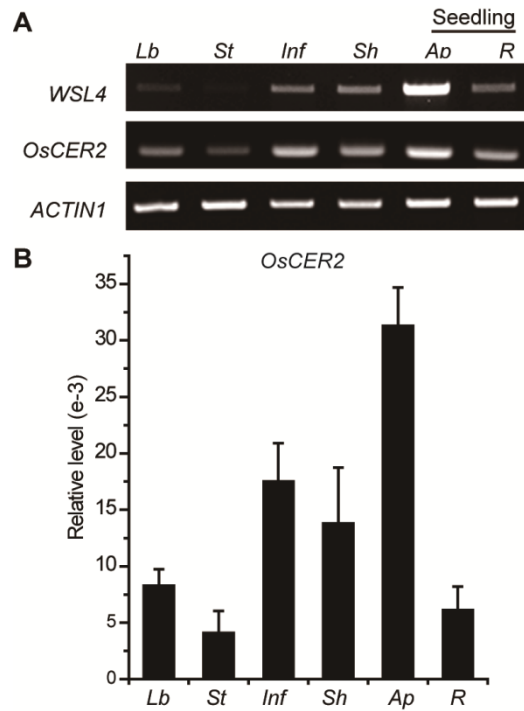

**Supplemental Figure S3.** Analysis of the expression pattern of *WLS4* and *OsCER2*. The cDNA was reverse transcribed from leaf blade (*Lb*), stem (*St*), inflorescence (*Inf*), sheath (*Sh*), aerial part (*Ap*) of two-week-old seedling and root of two-week-old seedling (*R*) for RT-PCR and qPCR. *Actin 1* gene was used as a control. All primers used are listed in the Supplemental Table S3.

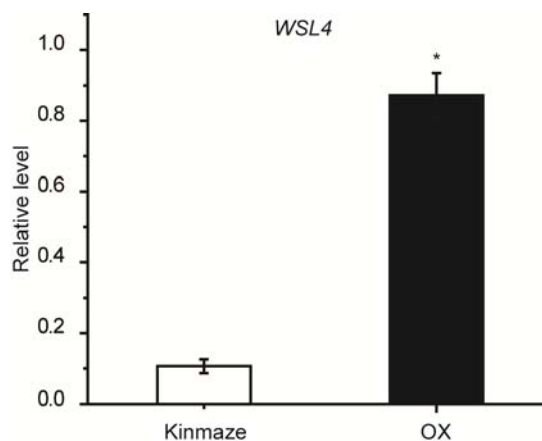

**Supplemental Figure S4.** qPCR analysis of *WLS4* expression in the overexpression line. Data are given as mean  $\pm$  SE ( $n = 3$ ). The asterisk indicates significant difference ( $P < 0.05$ ) determined in a Student's *t* test.

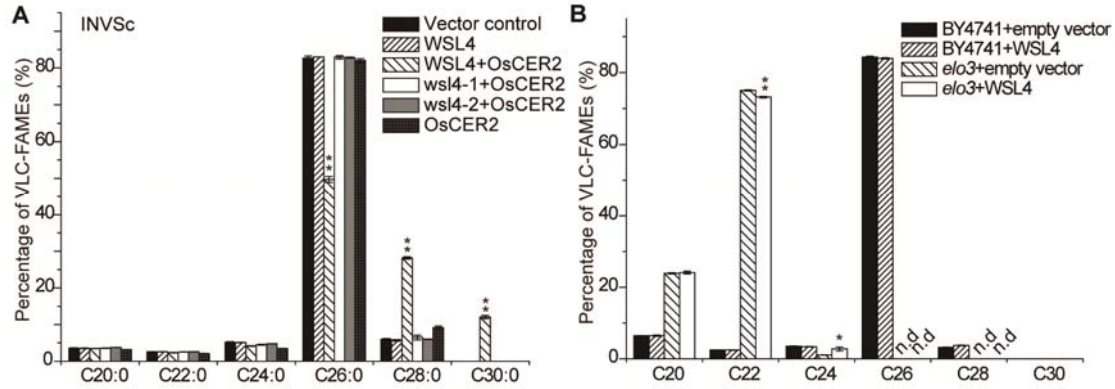

**Supplemental Figure S5.** Profiles of VLCFAs in yeast cells expressing *WSL4* and *OsCER2*. Expressing the empty vector, *WSL4*, *OsCER2*, *WSL4* & *OsCER2*, *wsl4-1* & *OsCER2*, and *wsl4-2* & *OsCER2* in wild-type INVSc yeast (A) and expressing *WSL4* alone in wild-type BY4741 and *elo3* yeast mutant (B). Data are mean  $\pm$  SE of three biological replicates. \*,  $P < 0.05$ ; \*\*,  $P < 0.01$ . *n*-nonadecanoic acid was used as the internal standard.

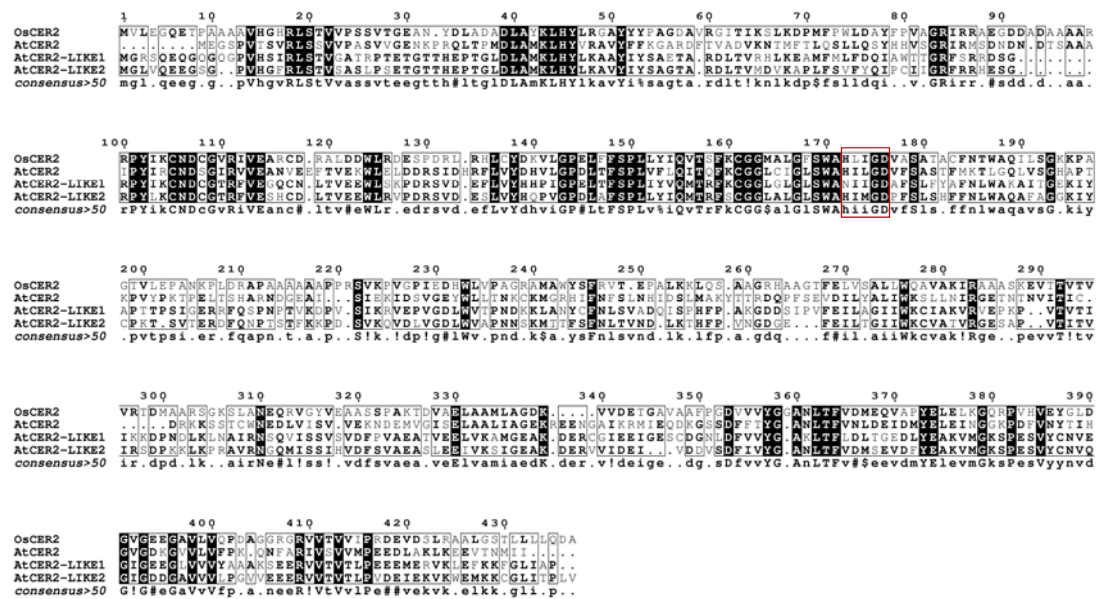

**Supplemental Figure S6.** Alignment of the amino acid sequences of *OsCER2* with *AtCER2*s. The amino acid sequences of *OsCER2* (Os04g0611200) were aligned with that of *AtCER2* (At4g24510), *AtCER2-LIKE1* (At4g13840), and *AtCER2-LIKE2* (At3g23840) by Hierarchical Clustering Analysis as described by Corpet (1988). The conserved HxxxD motif is boxed. Identical amino acids are shown on a black background, and gaps are indicated by dots.

**Corpet F (1988)** Multiple sequence alignment with hierarchical clustering. *Nucl Acids Res* **16**: 10881-10890

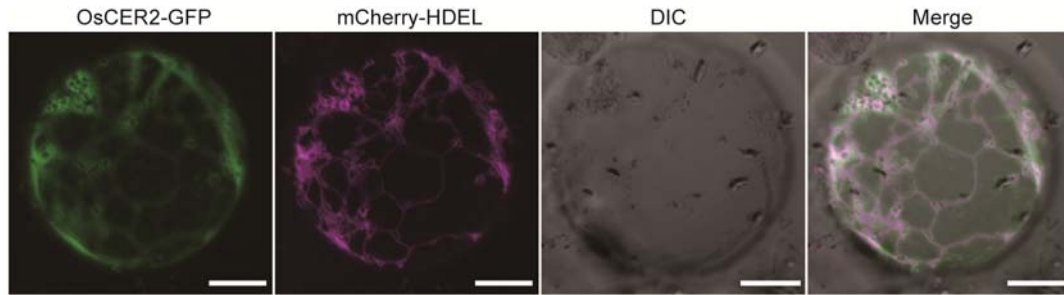

**Supplemental Figure S7.** Subcellular location of OsCER2. Co-expression of OsCER2-GFP fusion protein and the mCherry-HDEL fusion protein in the rice protoplasts. Scale bars = 10  $\mu$ m.

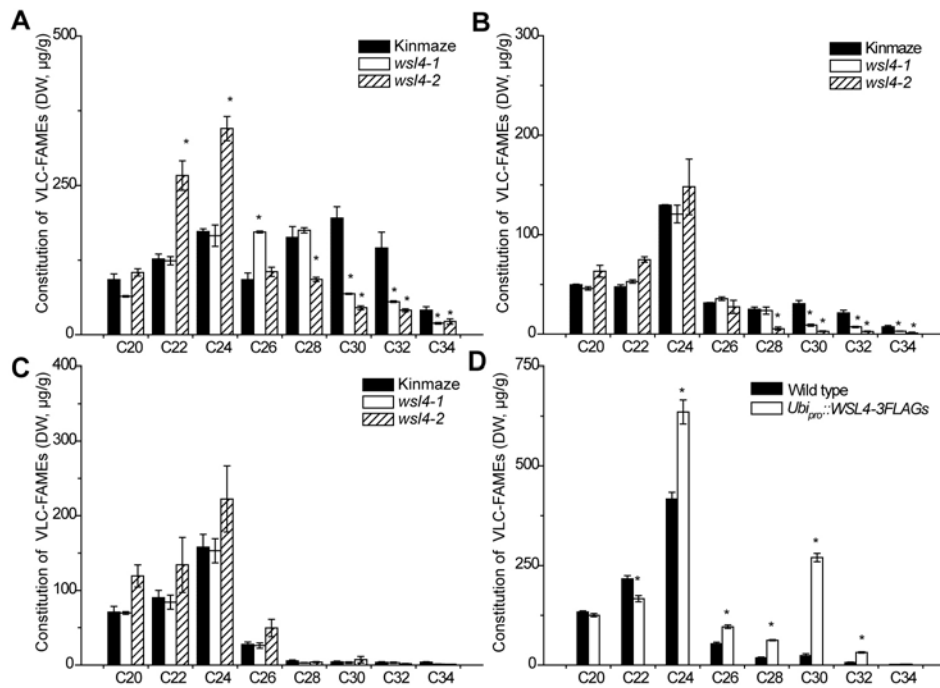

**Supplemental Figure S8.** Profiles of fatty acids distribution in rice organs and tissues. GC-MS analysis of VLCFAs from leaf blades with (A) and without (B) epicuticular wax, stem at booting stage (C) and rice calli (D). Data are expressed as means  $\pm$  S.E of three biological replicates. \*,  $P < 0.05$ ; \*\*,  $P < 0.01$ .

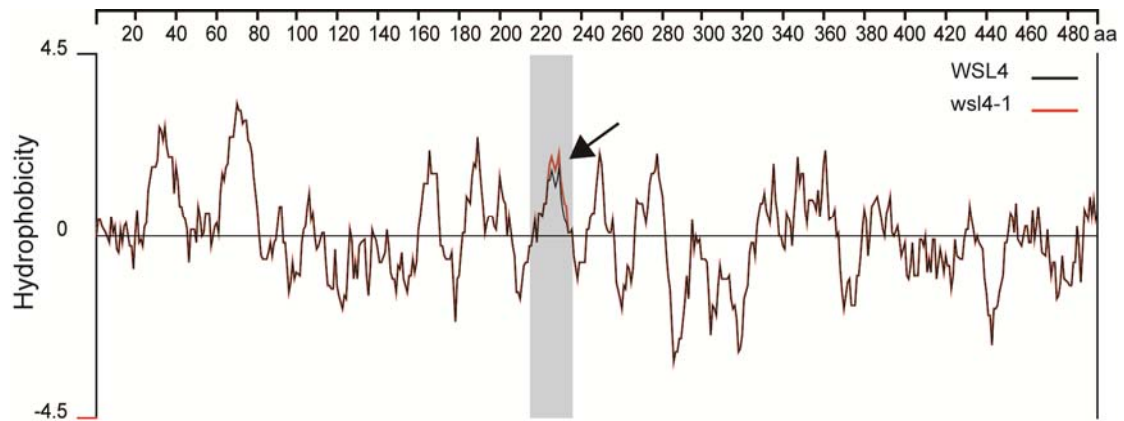

**Supplemental Figure S9.** Hydrophobicity plot (Kyte-Doolittle) for WSL4 and wsl4-1 peptides. The analyses were performed using Protean, Lasergene Biocomputing Software with Residue to Average set to default value 9. Arrow indicates the enhanced-Hydrophilicity region in the wsl4-1 peptide compared with that in the WSL4 peptide.

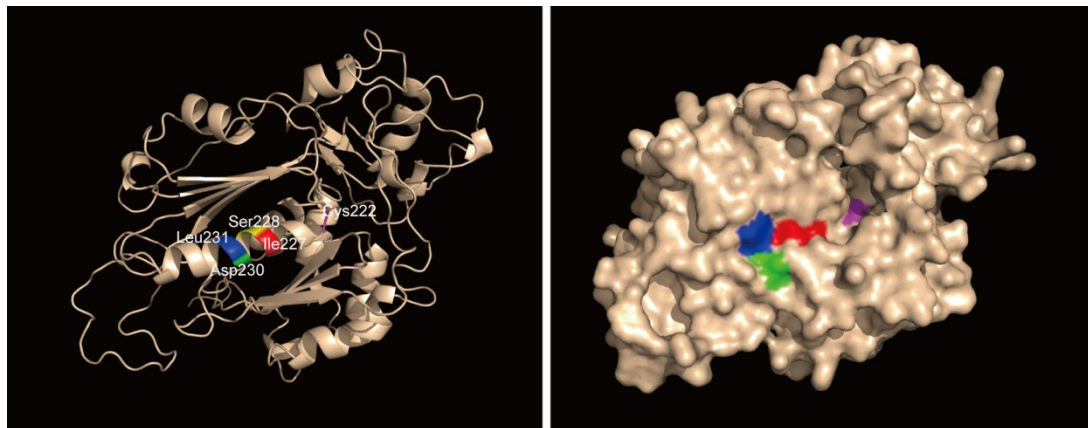

**Supplemental Figure S10. Three-dimensional homology modeling of WSL4.** The sequence of WSL4 was used to search and select suitable templates for modeling at the Swiss Model website (<http://swissmodel.expasy.org//SWISS-MODEL.html>). A three-dimensional homology model of WSL4 was generated using 1qlv.1.A, 1qlv.1.A, and 1leo.1.A as the templates. Cys222, Ile227, Ser228, Asp230, and Leu231 residues are colored by magenta, red, bright yellow, green, and blue, respectively.

**Supplemental Table S1.** Genotype for 14 markers from chromosome 3 across eight recombinants of F<sub>3</sub> offspring originating from a *wsl4-1* (*japonica*) × 9311 (*indica*) cross. SSR positions are indicated as described in McCouch et al. (2002). Mapping data format ‘AHB’ with A = homozygous *wsl4-1*, H = heterozygous and B = homozygous ‘9311’, Chr, chromosome, IND, individual of recombinants.

| SSR name       | RM14511  | RM6038   | RM14530  | RM7576   | RM14602  | C1       | C4       | C5       | C7       | C8       | <b>C9</b>       | <b>RM14612</b>  | RM14614  | RM14635  |
|----------------|----------|----------|----------|----------|----------|----------|----------|----------|----------|----------|-----------------|-----------------|----------|----------|
| Position [Mbp] | 4.661520 | 4.811234 | 4.114305 | 6.046794 | 6.134606 | 6.156255 | 6.157962 | 6.167017 | 6.218263 | 6.235762 | <b>6.239004</b> | <b>6.502880</b> | 6.521256 | 6.820547 |
| Chr.           | 3        | 3        | 3        | 3        | 3        | 3        | 3        | 3        | 3        | 3        | <b>3</b>        | <b>3</b>        | 3        | 3        |
| <i>wsl4-1</i>  | A        | A        | A        | A        | A        | A        | A        | A        | A        | A        | <b>A</b>        | <b>A</b>        | A        | A        |
| 9311           | B        | B        | B        | B        | B        | B        | B        | B        | B        | B        | <b>B</b>        | <b>B</b>        | B        | B        |
| IND-12-4       | B        | H        | H        | H        | H        | H        | H        | H        | H        | H        | <b>H</b>        | <b>H</b>        | H        | H        |
| IND-11-1       | H        | H        | H        | A        | A        | A        | A        | A        | A        | A        | <b>A</b>        | <b>A</b>        | A        | A        |
| IND-26-3       | A        | A        | A        | A        | A        | A        | A        | A        | A        | A        | <b>A</b>        | <b>H</b>        | H        | H        |
| IND-26-6       | A        | A        | A        | A        | A        | A        | A        | A        | A        | A        | <b>A</b>        | <b>H</b>        | H        | H        |
| IND-13-14      | A        | A        | A        | A        | A        | A        | A        | A        | A        | A        | <b>A</b>        | <b>A</b>        | A        | H        |
| IND-13-18      | H        | H        | H        | H        | H        | H        | H        | H        | H        | H        | <b>H</b>        | <b>A</b>        | A        | A        |
| IND-13-20      | B        | B        | B        | B        | B        | B        | B        | B        | B        | B        | <b>B</b>        | <b>B</b>        | B        | B        |
| IND-13-21      | A        | A        | A        | A        | A        | A        | A        | A        | A        | A        | <b>A</b>        | <b>H</b>        | H        | H        |

**Supplemental Table S2.** Mass-spectrometry identification of OsCER2 peptides.

| Contrib | Conf        | Sequence                   | Cleavages          | dMass        | Prec MW      | Prec m/z | Theor MW | Theor m/z |
|---------|-------------|----------------------------|--------------------|--------------|--------------|----------|----------|-----------|
| 2       | 99.00000095 | AALGSTLLLLQDA              |                    | -0.000959366 | -0.000959366 | 643.3713 | 1284.729 | 643.3718  |
| 2       | 99.00000095 | AEGDDADAAAAR               |                    | -0.00146701  | -0.00146701  | 566.7462 | 1131.479 | 566.7469  |
| 2       | 99.00000095 | ALDDWLRDESPDR              | missed R-D@7       | 0.00193802   | 0.00193802   | 529.9188 | 1586.733 | 529.9181  |
| 2       | 99.00000095 | APAAAAAAPP                 |                    | -0.00169661  | -0.00169661  | 482.2713 | 962.5298 | 482.2722  |
| 2       | 99.00000095 | EVTTVTVVR                  |                    | 0.000204001  | 0.000204001  | 502.2928 | 1002.571 | 502.2928  |
| 2       | 99.00000095 | GAYYYPAGDAVR               |                    | -0.0005297   | -0.0005297   | 651.809  | 1301.604 | 651.8093  |
| 2       | 99.00000095 | GGANLTFVDMEQVAPYELELK      | cleaved Y-G@N-term | 0.00225488   | 0.00225488   | 775.3882 | 2323.141 | 775.3875  |
| 2       | 99.00000095 | KPAGTVLEPANKPLDR           |                    | 0.000997718  | 0.000997718  | 427.2456 | 1704.952 | 427.2453  |
| 2       | 99.00000095 | LSTVVPSSVTGEANYDLADADLAYK  |                    | -0.031072499 | -0.031072499 | 664.0547 | 2652.221 | 664.0625  |
| 2       | 99.00000095 | LTFVDMEQVAPYELELK          | cleaved N-L@N-term | 0.00165015   | 0.00165015   | 675.6804 | 2024.018 | 675.6798  |
| 2       | 99.00000095 | PAAAVHGHHR                 | cleaved T-P@N-term | -0.0029717   | -0.0029717   | 493.7661 | 985.5206 | 493.7676  |
| 2       | 99.00000095 | PAGTVLEPANKPLDR            | cleaved K-P@N-term | -0.00174649  | -0.00174649  | 526.6258 | 1576.857 | 526.6264  |
| 2       | 99.00000095 | PVGPIEDHWLVPAGR            | cleaved K-P@N-term | -0.000699272 | -0.000699272 | 548.2946 | 1641.863 | 548.2949  |
| 2       | 99.00000095 | PVHVEYGLDGVGEEGAVLVQPDAGGR | cleaved R-P@N-term | -0.00044266  | -0.00044266  | 874.1047 | 2619.293 | 874.1049  |
| 2       | 99.00000095 | RAEGDDADAAAAR              | missed R-A@1       | 0.000443195  | 0.000443195  | 430.2009 | 1287.58  | 430.2007  |

Fifteen peptides of OsCER2 (accession number: Os04g0611200) were identified by LC-MS; the coverage rate reached 56.29%.

**Supplemental Table S3. Primers.**

| Reaction                                     | Primer name                | Sequence information                             |
|----------------------------------------------|----------------------------|--------------------------------------------------|
| Genomic fragment cloning                     | WSL4RE-F1                  | 5'-ATTCACGAAACCACCTGCCAC                         |
|                                              | WSL4RE-R1                  | 5'-AGACAAGTTCAGGCAGAGCAGTG                       |
|                                              | WSL4RE-F2                  | 5'-ACCAACCTACTATCGGATGTGAC                       |
|                                              | WSL4RE-R2                  | 5'-GGCTTGTAGCAGGAGTAGTCG                         |
|                                              | WSL4RE-F3                  | 5'-CGGGGAAGTAGTGAGAGCATC                         |
|                                              | WSL4RE-R3                  | 5'-GAGGTGTAGGGGAGGTAATGC                         |
|                                              | WSL4RE-F4                  | 5'-TCAACAAGAAGTGAAGCCG                           |
|                                              | WSL4RE-R4                  | 5'-AGATCGGGCATGTAAGTAAAC                         |
| Over-expression and subcellular localization | WSL4 cDNA-F1               | 5'-AGAGCATCGATCATGCCG                            |
|                                              | WSL4 cDNA-R1               | 5'-CGATCACAGCTTGACGACC                           |
|                                              | OsCER2 cDNA-F1             | 5'-AAGCGCGATTCCCTTGCCATG                         |
|                                              | OsCER2 cDNA-R1             | 5'-TCAGGCGTCTTGACGAGCAG                          |
| Promoter GUS assay                           | WSL4GUS-F1                 | 5'-ACGcgtcgacTACAATCCTGTCCCACGAAG                |
|                                              | WSL4GUS-R1                 | 5'-TCCccccgggGATCGATGCTCTCACTACTCC               |
| Fatty acid analysis                          | AtCER2YE-F1                | 5'-AATTGAATTCATGGAGGGAAGCCCAGTGAC                |
|                                              | AtCER2YE-R1                | 5'-AATTGCGGCCGTATAATCATATAGTCACCTCCTCC           |
|                                              | WSL4YEOP-F1                | 5'-ggatccTTAATAATGCCAGGTGCTGCTGGTT               |
|                                              | WSL4YEOP-R1                | 5'-gaattcTTTACAACCTGACAACCTTCTGG                 |
|                                              | OsCER2YE-F1                | 5'-CCGgaattcATGGTGCTCGAGGGGCAGG                  |
|                                              | OsCER2YE-R1                | 5'-GGACTAGTTCAGGCGTCTTGACGAGCAGCAG               |
| Gene expression analysis                     | WSL4REAL-F1                | 5'-ACCACTACATCCC GCCTAAC                         |
|                                              | WSL4REAL-R1                | 5'-AGACTGCAGTTGACGACGAG                          |
|                                              | OsCER21rt-F1               | 5'-CTCTGCTACGACAAGGTGCTC                         |
|                                              | OsCER21rt-R1               | 5'-TGACGCGGAAGGAGTACCAC                          |
|                                              | OsCER21REAL-F1             | 5'-CATGGCGTGGTACTCCTTC                           |
|                                              | OsCER21REAL-R1             | 5'-GAGACGAGCTCGAACGTG                            |
| Yeast-two-hybrid assay                       | WSL4Y2H-F1                 | 5'- TACTCTTATggccattacggccATGCCAGGTGCTGCTGGTT    |
|                                              | WSL4Y2H-R1                 | 5'-TACTCTTATggccgagggggccGCCAACTTGACAACCTTCTG    |
|                                              | OsCER2Y2H-F1               | 5'-TACTCTTATggccattacggccATGGTGCTCGAGGGGCAGG     |
|                                              | OsCER2Y2H-R1               | 5'-TACTCTTATggccgagggggccGCGGCGTCTTGACGAGCAGCAGG |
| Site-directed mutagenesis                    | WSL4MuS <sub>228</sub> F-F | 5'-TTCTGCTGGTTTGATTTTTTTAGATTGGC                 |
|                                              | WSL4MuS <sub>228</sub> F-R | 5'-AAAATCAAACCAGCAGAACAACCCATACCAG               |
|                                              | WSL4MuN <sub>422</sub> S-F | 5'-CCTTGCATAGATTCCGGTAGTACCTCCAGTTC              |
|                                              | WSL4MuN <sub>422</sub> S-R | 5'-CTACCGAATCTATGCAAGGTCATTCTACTAG               |
|                                              | WSL4c#-F1                  | 5'-CCAGACCAGGATTCTTGAGCGG                        |
|                                              | WSL4c#-R1                  | 5'-AACCGCACGCTCTTCTCGTCGTC                       |
|                                              | WSL4c#-F2                  | 5'-GTTCCAGACCAGGATTCTTGAGCGGTCCGGG               |
|                                              | WSL4c#-R2                  | 5'-AAGAATCCTGGTCTGGAACCGCACGCTCTTC               |
|                                              | WSL4c#-F3                  | 5'-GAAGTACGTGAAGCTGGGTAC                         |
|                                              | WSL4c#-R3                  | 5'-AGCTTCACCGACCCGGAGTAC                         |
|                                              | OsCER2H <sub>172</sub> A-F | 5'-CAGCTGGGCGGCCCTCATCGGC                        |
|                                              | OsCER2H <sub>172</sub> N-F | 5'-CAGCTGGGCGAACCTCATCGGC                        |



|              |                             |                           |
|--------------|-----------------------------|---------------------------|
|              | OsCER2 <sub>H172</sub> E-F  | 5'-CAGCTGGGCGGAGCTCATCGGC |
|              | OsCER2 <sub>H172</sub> MU-R | 5'-AAGCCGAGCGCCATGCCACCGC |
|              | OsCER2 <sub>D176</sub> A-F  | 5'-GCACCTCATCGGCGCCGTGGCG |
|              | OsCER2 <sub>D176</sub> H-F  | 5'-GCACCTCATCGGCCACGTGGCG |
|              | OsCER2 <sub>D176</sub> MU-R | 5'-GCCCAGCTGAAGCCGAGCGCC  |
| InDel marker | C9-F                        | 5'-TCTAGTTCGGCTAGTCGGC    |
|              | C9-R                        | 5'-GTCTCGCAAAGTAGTCGAAATC |

**Supplemental Table S4.** Transgenic yeast cell lines.

| Genes expressed              | Expression vectors   |                                           | Selection medium |
|------------------------------|----------------------|-------------------------------------------|------------------|
| WSL4                         | pYES2- <i>WSL4</i>   | pESCHis                                   | -Ura/-His        |
| OsCER2                       | pYES2                | pESCHis- <i>OsCER2</i>                    | -Ura/-His        |
| AtCER2                       | pYES2                | pESCHis- <i>OsCER2</i>                    | -Ura/-His        |
| WSL4+OsCER2                  | pYES2- <i>WSL4</i>   | pESCHis- <i>OsCER2</i>                    | -Ura/-His        |
| WSL4+AtCER2                  | pYES2- <i>WSL4</i>   | pESCHis- <i>OsCER2</i>                    | -Ura/-His        |
| wsl4-1+OsCER2                | pYES2- <i>wsl4-1</i> | pESCHis- <i>OsCER2</i>                    | -Ura/-His        |
| wsl4-2+OsCER2                | pYES2- <i>wsl4-2</i> | pESCHis- <i>OsCER2</i>                    | -Ura/-His        |
| WSL4+OsCER2 <sub>H172N</sub> | pYES2- <i>WSL4</i>   | pESCHis-<br><i>OsCER2<sub>H172N</sub></i> | -Ura/-His        |
| WSL4+OsCER2 <sub>H172E</sub> | pYES2- <i>WSL4</i>   | pESCHis-<br><i>OsCER2<sub>H172E</sub></i> | -Ura/-His        |
| WSL4+OsCER2 <sub>D176A</sub> | pYES2- <i>WSL4</i>   | pESCHis-<br><i>OsCER2<sub>D176A</sub></i> | -Ura/-His        |
| WSL4+OsCER2 <sub>D176H</sub> | pYES2- <i>WSL4</i>   | pESCHis-<br><i>OsCER2<sub>D176H</sub></i> | -Ura/-His        |
